# Supplementary material for: Aromaticity and photophysics of tetrasila- and tetragerma-annelated tetrathienylenes as new representatives of the hetero[8]circulene family
Source: Royal Society of Chemistry journal article supplement (doi:10.1039/c9cp01608b), 2019-01-01
Supplement: c9cp01608b1.pdf [file c9cp01608b1.pdf]

# Aromaticity and photophysics of tetrasila- and tetragerma-annelated tetrathienylenes as new representatives of the hetero[8]circulenes family

G. V. Baryshnikov,<sup>a,b,\*</sup> R. R. Valiev,<sup>c,d</sup> V. N. Cherepanov,<sup>d</sup>  
N. N. Karaush-Karmazin,<sup>b</sup> V. A. Minaeva,<sup>b</sup> B. F. Minaev,<sup>b</sup> H. Ågren<sup>a,d</sup>

<sup>a</sup> *Division of Theoretical Chemistry and Biology, School of Engineering Sciences in Chemistry, Biotechnology and Health, KTH Royal Institute of Technology, 10691, Stockholm, Sweden*

<sup>b</sup> *Department of Chemistry and Nanomaterials Science, Bohdan Khmelnytsky National University, 18031, Cherkasy, Ukraine*

<sup>c</sup> *Research School of Chemistry & Applied Biomedical Sciences, National Research Tomsk Polytechnic University, Lenin Avenue 30, Tomsk 634050, Russia*

<sup>d</sup> *Tomsk State University, 36 Lenin Avenue, Tomsk, Russia*

## ELECTRONIC SUPPORTING INFORMATION (ESI)

|                                                                                                                                                                                                                          |     |
|--------------------------------------------------------------------------------------------------------------------------------------------------------------------------------------------------------------------------|-----|
| Computational details on photophysics calculations                                                                                                                                                                       | P.2 |
| <b>Table S1.</b> Calculated bond lengths (Å) in the ground and first excited singlet state of tetrasilatetrathia[8]circulene and tetragermatetrathia[8]circulene molecules                                               | P.4 |
| <b>Figure S1.</b> The shape of frontier molecular orbitals of the 4S4SiEt <sub>2</sub> and 4S4GeEt <sub>2</sub> molecules                                                                                                | P.5 |
| <b>Figure S2.</b> The shape of promotive modes in the absorption vibronic spectra of 4S4SiEt <sub>2</sub> (4S4GeEt <sub>2</sub> ) molecules and their H-substituted 4S4SiH <sub>2</sub> (4S4GeH <sub>2</sub> ) models.   | P.5 |
| <b>Figure S3.</b> The shape of promotive modes in the fluorescence vibronic spectra of 4S4SiEt <sub>2</sub> (4S4GeEt <sub>2</sub> ) molecules and their H-substituted 4S4SiH <sub>2</sub> (4S4GeH <sub>2</sub> ) models. | P.6 |

## Computational details on photophysics calculations

The ISC and IC non-radiative rate constants were calculated using the method describing in Ref.<sup>1</sup> The general formula for the calculation of radiationless rate constants ( $k_{nr}$ ) according to this method is:

$$k_{nr} = \sum_n |V_{i0,fn}|^2 \Gamma_{fn} \left[ \Delta_{if}^2 + \frac{\Gamma_{fn}^2}{4} \right]^{-1} \quad (1),$$

where  $i$  is the initial electronic state,  $f$  is the final electronic state,  $n$  is a vibrational level of  $f$ ,  $\Gamma_{fn}$  is the relaxation width of the vibronic level  $|fn\rangle$ ,  $\Delta_{if} = |E_{i0} - E_{fn}|$  is the resonance defect energy between the initial and final vibronic states, and  $V_{i0,fn}$  is the matrix element of the perturbation operator. Only the lowest vibronic state is considered for the initial state at room temperature. In the case of ISC, the perturbation operator is the spin-orbit coupling interaction, and for IC is the non-adiabatic coupling interaction one. Eq. (1) written in atomic units holds at ambient temperatures ( $T \leq 300$  K) when  $k_{nr} \ll \Gamma_{fn}$ .  $\Gamma_{fn}$  is about  $10^{14} \text{ s}^{-1}$ , and is generally much larger than  $k_{nr}$  which typically has values around  $10^7$ - $10^{12} \text{ s}^{-1}$ .<sup>1</sup> The  $\Delta_{if}$  value is not larger than  $100 \text{ cm}^{-1}$  for polyatomic molecules.<sup>1</sup> The expression can be simplified to Eq. (2) when assuming that  $\Gamma_{fn}$  depends only weakly on the vibrational level  $n$ , and that  $\Delta_{if} \ll \Gamma_{fn}$ .<sup>1</sup>

$$k_{nr} = 1.6 \cdot 10^9 \sum_n |V_{i0,fn}|^2 \quad (2).$$

where  $|V_{i0,fn}|$  in  $\text{cm}^{-1}$ ,  $k_{nr}$  in  $\text{s}^{-1}$ . The matrix element  $|V_{i0,fn}|$  of ISC is

$$|V_{i0,fn}| = \langle i | \hat{H}_{SO} | f \rangle \left( \prod_{k=1}^{3N-6} \sqrt{\frac{\exp(-y_k) y_k^{n_k}}{n_k!}} \right) \quad (3)$$

and for IC is

$$|V_{i0,fn}| = - \sum_v \sum_{q=x,y,z} M_v^{-1} \langle i | \frac{\partial}{\partial R_{qv}} | f \rangle \left[ \sum_{j=1}^{3N-6} B_{vqj} \langle 0_j | \frac{\partial}{\partial Q_j} | n_j \rangle \prod_{\substack{k \neq j \\ k=1}}^{3N-6} \sqrt{\frac{\exp(-y_k) y_k^{n_k}}{n_k!}} \right] \quad (4),$$

where  $y_k$  is the Huang-Rhys factor of the  $k$ -th mode and  $\omega_k$  is the frequency of the  $k$ -th mode,  $\langle i | H_{SO} | f \rangle$  and  $\langle i | \frac{\partial}{\partial R_{qv}} | f \rangle$  are the matrix elements of the spin-orbital coupling interaction operator  $H_{SO}$  and non-adiabatic coupling interaction operator ( $\frac{\partial}{\partial R_{qv}}$ ) between the initial and final electronic states  $i$  and  $f$ , respectively.

The  $E_{if}$  is the energy gap between the electronic states,  $\{R_{qv}\}$  are the Cartesian coordinates,  $M_v$  is mass of  $v$ -th atom. The  $|n_j\rangle$  is the wave-function of  $j$ -th harmonic oscillator and  $n_j$  is number of excitation and  $Q_j$  is its normal coordinate. The  $B_{vqj}$  is the matrix relationship between  $\{R_{qv}\}$  and  $\{Q_j\}$ .

The Huang-Rhys factors were calculated according to Eq (5):

$$y_j = \frac{1}{2} \omega_j \Delta Q_j^2 \quad (4),$$

where  $\Delta Q_j^2$  is the equilibrium position displacement of the  $j$ -th mode<sup>1</sup>.

The radiative rate constant was calculated using modified Strickler–Berg equation<sup>2</sup>:

$$k_r = \frac{1}{1.5003} f \cdot E_{if}^2 \quad (5),$$

where  $f$  – oscillator strengths and  $E_{if}$  (in  $\text{cm}^{-1}$ ).

[1] R. R. Valiev, V. N. Cherepanov, G. V. Baryshnikov and D. Sundholm, *Phys. Chem. Chem. Phys.*, 2018, **20**, 6121.

[2] Strickler S. J. and Berg R. A. // *J. Chem. Phys.* – 1962. – V. 37. – No. 4 – P. 814–822.

**Table S1.** Calculated bond lengths (Å) in the ground and first excited singlet state of tetrasilatetrathia[8]circulene and tetragermatetrathia[8]circulene molecules

| Bond     | Si                  |                | Ge                  |                |
|----------|---------------------|----------------|---------------------|----------------|
|          | S <sub>0</sub>      | S <sub>1</sub> | S <sub>0</sub>      | S <sub>1</sub> |
| $r_1$    | 1.437/ <b>1.428</b> | 1.429          | 1.442/ <b>1.437</b> | 1.434          |
| $r_2$    | 1.400/ <b>1.401</b> | 1.443          | 1.397/ <b>1.397</b> | 1.396          |
| $r_3$    | 1.718/ <b>1.704</b> | 1.710          | 1.712/ <b>1.697</b> | 1.749          |
| $r_4$    | 1.718/ <b>1.704</b> | 1.754          | 1.712/ <b>1.698</b> | 1.704          |
| $r_5$    | 1.400/ <b>1.401</b> | 1.398          | 1.397/ <b>1.394</b> | 1.445          |
| $r_6$    | 1.871/ <b>1.863</b> | 1.884          | 1.921/ <b>1.939</b> | 1.921          |
| $r_7$    | 1.871/ <b>1.866</b> | 1.853          | 1.921/ <b>1.930</b> | 1.920          |
| $r_8$    | 1.400/ <b>1.396</b> | 1.408          | 1.397/ <b>1.395</b> | 1.444          |
| $r_9$    | 1.493/ <b>1.489</b> | 1.485          | 1.495/ <b>1.496</b> | 1.446          |
| $r_{10}$ | 1.718/ <b>1.704</b> | 1.733          | 1.712/ <b>1.696</b> | 1.704          |
| $r_{11}$ | 1.718/ <b>1.703</b> | 1.732          | 1.712/ <b>1.698</b> | 1.750          |
| $r_{12}$ | 1.400/ <b>1.399</b> | 1.410          | 1.397/ <b>1.398</b> | 1.397          |
| $r_{13}$ | 1.437/ <b>1.431</b> | 1.423          | 1.442/ <b>1.433</b> | 1.434          |
| $r_{14}$ | 1.871/ <b>1.865</b> | 1.864          | 1.922/ <b>1.930</b> | 1.930          |
| $r_{15}$ | 1.872/ <b>1.865</b> | 1.862          | 1.922/ <b>1.928</b> | 1.907          |
| $r_{16}$ | 1.400/ <b>1.398</b> | 1.410          | 1.396/ <b>1.394</b> | 1.405          |
| $r_{17}$ | 1.493/ <b>1.490</b> | 1.480          | 1.495/ <b>1.487</b> | 1.486          |
| $r_{18}$ | 1.437/ <b>1.430</b> | 1.422          | 1.442/ <b>1.439</b> | 1.429          |
| $r_{19}$ | 1.718/ <b>1.705</b> | 1.732          | 1.712/ <b>1.692</b> | 1.726          |
| $r_{20}$ | 1.718/ <b>1.705</b> | 1.735          | 1.712/ <b>1.696</b> | 1.726          |
| $r_{21}$ | 1.400/ <b>1.400</b> | 1.409          | 1.397/ <b>1.392</b> | 1.405          |
| $r_{22}$ | 1.871/ <b>1.862</b> | 1.852          | 1.921/ <b>1.929</b> | 1.915          |
| $r_{23}$ | 1.871/ <b>1.862</b> | 1.884          | 1.921/ <b>1.926</b> | 1.916          |
| $r_{24}$ | 1.400/ <b>1.402</b> | 1.399          | 1.397/ <b>1.391</b> | 1.405          |
| $r_{25}$ | 1.493/ <b>1.488</b> | 1.484          | 1.494/ <b>1.491</b> | 1.483          |
| $r_{26}$ | 1.718/ <b>1.704</b> | 1.754          | 1.712/ <b>1.700</b> | 1.725          |
| $r_{27}$ | 1.718/ <b>1.702</b> | 1.711          | 1.712/ <b>1.698</b> | 1.724          |
| $r_{28}$ | 1.400/ <b>1.400</b> | 1.443          | 1.397/ <b>1.391</b> | 1.404          |
| $r_{29}$ | 1.437/ <b>1.429</b> | 1.429          | 1.442/ <b>1.433</b> | 1.430          |
| $r_{30}$ | 1.871/ <b>1.861</b> | 1.870          | 1.921/ <b>1.926</b> | 1.907          |
| $r_{31}$ | 1.871/ <b>1.864</b> | 1.872          | 1.921/ <b>1.934</b> | 1.930          |
| $r_{32}$ | 1.493/ <b>1.489</b> | 1.447          | 1.494/ <b>1.490</b> | 1.486          |

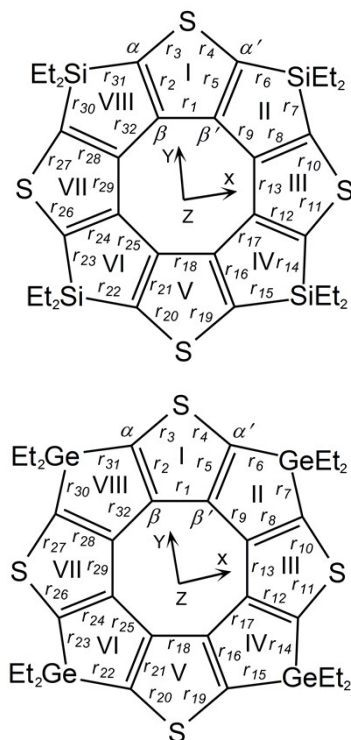

Experimental data (in bold) from Refs.<sup>22,23</sup> obtained by X-ray analysis.

Parameter  $r$  denotes the bond in accordance with Figure presented from the right on Table.

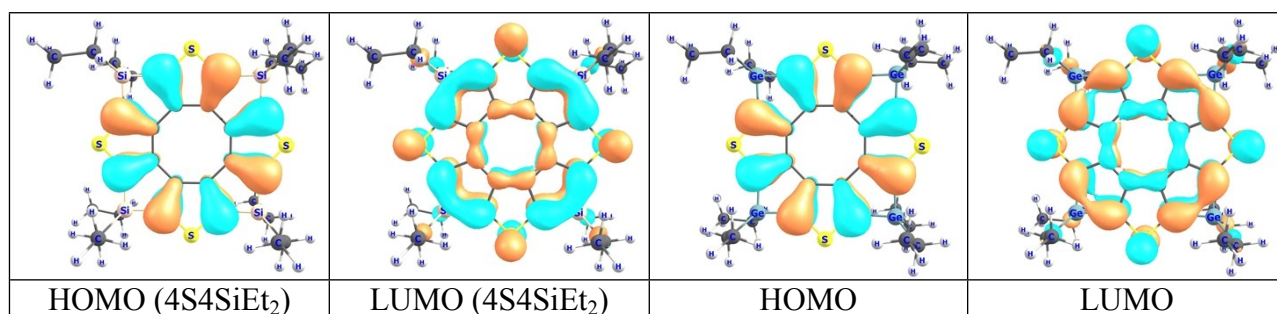

**Figure S1.** The shape of frontier molecular orbitals of the 4S4SiEt<sub>2</sub> and 4S4GeEt<sub>2</sub> molecules

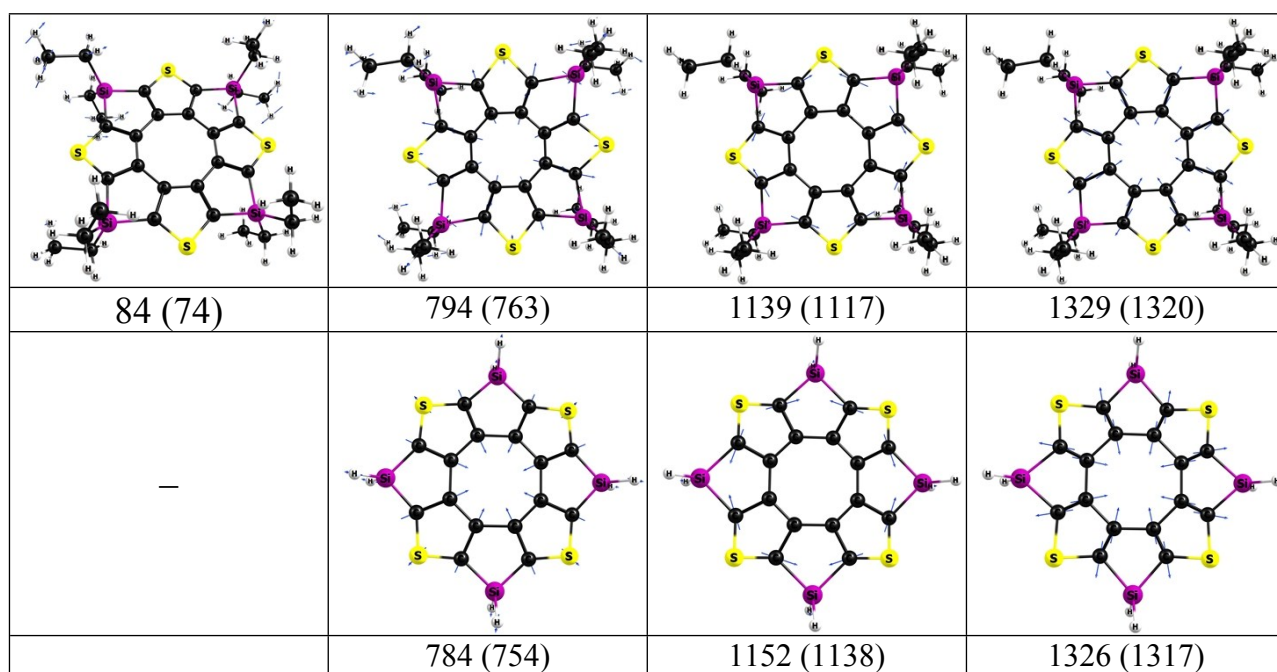

**Figure S2.** The shape of promotive modes in the absorption vibronic spectra of 4S4SiEt<sub>2</sub> (4S4GeEt<sub>2</sub>) molecules (top) and their H-substituted 4S4SiH<sub>2</sub> (4S4GeH<sub>2</sub>) models (bottom). Numbers are in cm<sup>-1</sup>. The scaled displacement vectors are absolutely the same for the pairs of 4S4SiEt<sub>2</sub> (4S4GeEt<sub>2</sub>) and 4S4SiH<sub>2</sub> (4S4GeH<sub>2</sub>) molecules, that is why only Si-containing systems are presented.

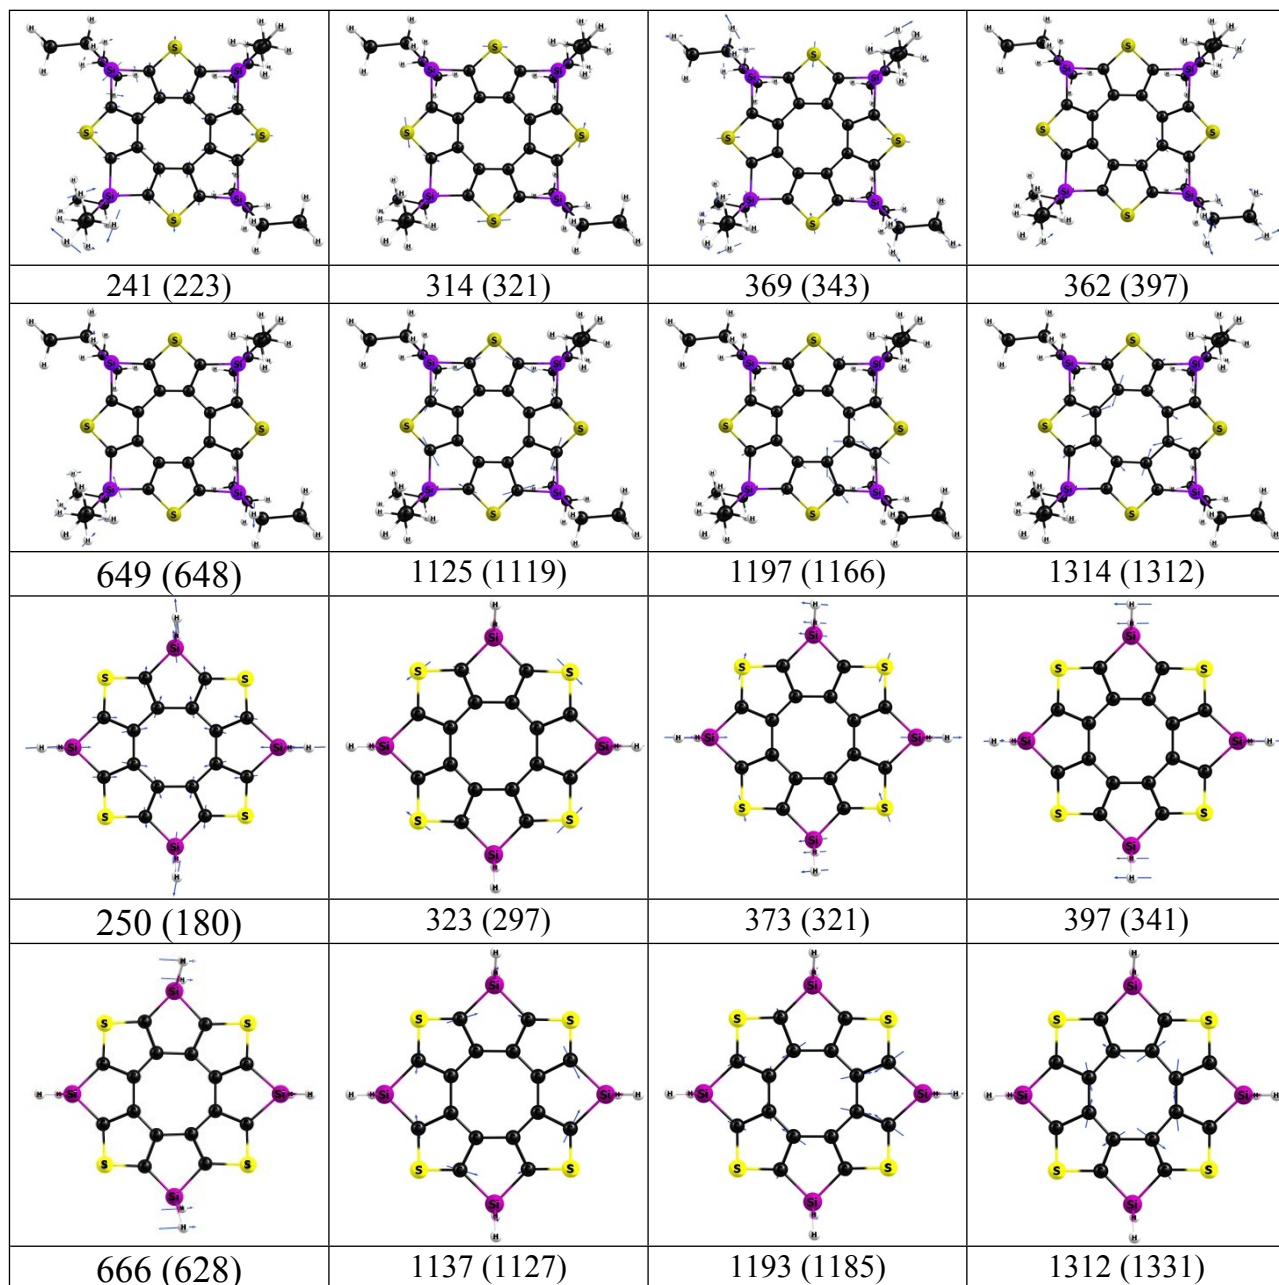

**Figure S3.** The shape of promotive modes in the fluorescence vibronic spectra of  $4S4SiEt_2$  ( $4S4GeEt_2$ ) molecules (top) and their H-substituted  $4S4SiH_2$  ( $4S4GeH_2$ ) models (bottom). Numbers are in  $cm^{-1}$ . The scaled displacement vectors are absolutely the same for the pairs of  $4S4SiEt_2$  ( $4S4GeEt_2$ ) and  $4S4SiH_2$  ( $4S4GeH_2$ ) molecules, that is why only Si-containing systems are presented.
